# Supplementary material for: Direct and nitrite-sensitized indirect photolysis of effluent-derived phenolic contaminants under UV254irradiation
Source: Royal Society of Chemistry journal article supplement (doi:10.1039/d1em00381j), 2021-12-04
Supplement: d1em00381j1.pdf [file d1em00381j1.pdf]

*Electronic Supporting Information (ESI)*

Direct photolysis and nitrite-sensitized indirect photolysis of effluent-derived phenolic contaminants under UV<sub>254</sub> irradiation

Yueyue Li<sup>a</sup>, Lixiao Wang<sup>a</sup>, Haiyan Xu<sup>a</sup>, Junhe Lu<sup>a</sup>, Jean-Marc Chovelon<sup>b</sup>, Yuefei Ji<sup>a,\*</sup>

<sup>a</sup> College of Resources and Environmental Sciences, Nanjing Agricultural University, Nanjing 210095, China

<sup>b</sup> Univ Lyon, Université Claude Bernard Lyon 1, CNRS, IRCELYON, F-69626, Villeurbanne, France

\* Corresponding author. Yuefei Ji, College of Resources and Environmental Sciences, Nanjing Agricultural University, Nanjing 210095, China.

E-mail addresses: yuefeiji@njau.edu.cn (Y. Ji).

### Text S1. Reagents and materials

Bisphenol A (BPA, 99%), isopropanol (*i*-PrOH,  $\geq 99.5\%$ ), and sodium nitrite ( $\text{NaNO}_2$ ) were purchased from Sigma-Aldrich (St. Louis, MO, USA). Acetaminophen (ATP, 99%) was purchased from Macklin Company (Shanghai, China). 2,4-Dihydroxybenzophenone (BP1,  $\geq 98\%$ ) was obtained from TCI Company (Tokyo, Japan). Salbutamol sulfate (SAL, 99%) was purchased from Yuanye Reagent Co. Ltd (Nanjing, China). Chromatographic acetonitrile (ACN), methanol (MeOH), and formic acid were obtained from Burdick & Jackson (Muskegon, MI, USA). All other reagents were of analytical purity or higher grade. Suwanee River natural organic matter (SRNOM, 2R101N) was purchased from the International Humus Society (St. Paul, MN, USA).

### Text S2. Identification of intermediate products by LC-qTOF-MS/MS

The SPE-concentrated samples were analyzed by LC-qTOF-MS/MS to identify the phenolic compounds and their TPs. Analytical separation was achieved by a Kinetex LC-C<sub>18</sub> reversed-phase column (2.6  $\mu\text{m}$ , 100 mm  $\times$  2.1 mm, i.d.). The mobile phase was a mixture of 50% MeOH and 50% Milli-Q water at a flow rate of 0.3 mL min<sup>-1</sup>, and the injection volume was 2  $\mu\text{L}$ . Mass spectrometer worked under negative ion mode using an electrospray ionization source (ESI). Instrumental parameters were as follows: ion spray voltage (ISVF), 4500 V; ion source temperature (TEM), 550 °C; atomizing gas (GS1), 65 psi; auxiliary gas (GS2), 65 psi; curtain gas (CUR), 35 psi. The mass spectrum data acquisition mode was the full scanning of high-resolution time-of-flight mass spectrometry (TOF MS) and simultaneously triggered acquisition of high-resolution secondary mass spectrometry (TOF MS IDA MS/MS). The resolution of the mass spectrometry was 30000 (500  $m/z$  FWHM). The scanning range of TOF-MS and IDA MS/MS was  $m/z$  50 - 800. Declustering potential (DP), collision energy (CE), and collision energy spread (CES) were -80 V, -30 eV, and 10 eV, respectively. Instrument control, data acquisition and processing were performed using the PeakView analysis software (AB Sciex, Boston, USA).

### Text S3. Possible reasons accounting for the absence of fluorescence detected for BPA, ATP, and BP1

The absence of fluorescence detected by BPA may be related to the isopropyl side chain. Such flexible alkyl chain facilitates the deactivation of excited state BPA via nonradiative pathway (discussed below). The hydroxyl (-OH) and amine (-NH) substituents in ATP molecular structure are important fluorophores. The lack of fluorescence of ATP is possibly due to the fact that bond cleavage occurred rapidly from its lowest lying singlet excited state (S1) (Pozdnyakov et al., 2014). Previous study has reported that UV<sub>254</sub> irradiation could cause the amide bond cleavage of ATP followed by the photo-Fries rearrangement (Kawabata et al., 2012). BP1 contains several chromophores including phenyl, phenolic, and carbonyl groups. Therefore, its singlet and triplet excited states may involve different electronic configurations, which are favorable for intersystem crossing (ISC) process through spin-orbit coupling (SOC) (Turro et al., 2010). The rapid ISC

process competes with the fluorescence process, resulting in a very low fluorescence quantum yield ( $\Phi_F \approx 0$ ) of benzophenone derivatives (Boscá and Miranda, 1998). In addition, the lack of fluorescence of BP1 may also be explained by its intramolecular charge transfer which can result in fluorescence quenching (Bhasikuttan et al., 1998).

#### Text S4. Calculation of steady-state concentration of $\text{NO}_2^\bullet$

According to the above results, reactive radicals such as  $\text{HO}^\bullet$  and  $\text{NO}_2^\bullet$  play critical roles in the  $\text{NO}_2^-$ -sensitized photolysis of phenolic compounds, including BPA, SAL, and BP1. Assuming that the degradation of phenolic compounds is contributed by both direct and indirect photolysis (mediated mainly by  $\text{HO}^\bullet$  and  $\text{NO}_2^\bullet$ ), the reaction rate constant ( $k_{\text{NO}_2^\bullet}$ ) contributed by  $\text{NO}_2^\bullet$  can be described by the following equation:

$$k_{\text{NO}_2^\bullet} = k_{\text{obs}} - k_{\text{dp}} - k_{\text{HO}^\bullet} \quad (\text{S1})$$

where  $k_{\text{obs}}$  is the observed rate constant of sensitized photolysis of phenolic compounds;  $k_{\text{dp}}$  is the direct photolysis rate constant, which can be calculated by equation (2);  $k_{\text{HO}^\bullet}$  is the reaction rate constant contributed by  $\text{HO}^\bullet$ , which can be calculated by  $k_{\text{HO}^\bullet} = k_{\text{HO}^\bullet, \text{PC}} [\text{HO}^\bullet]_{\text{ss}}$ .  $k_{\text{HO}^\bullet, \text{PC}}$  is the second-order rate constant for the reaction of  $\text{HO}^\bullet$  with phenolic compounds (obtained from literatures, see Table 2), and  $[\text{HO}^\bullet]_{\text{ss}}$  is the steady-state concentration of  $\text{HO}^\bullet$ .

In the  $\text{UV}_{254}/\text{NO}_2^-$  system,  $[\text{HO}^\bullet]_{\text{ss}}$  is mainly determined by its formation rate and consumption reaction rate constants (Eq. (S2)) (Li et al., 2021):

$$[\text{HO}^\bullet]_{\text{ss}} = \frac{2.3 E_p^0 \varepsilon_{\text{NO}_2^-}^{254} [\text{NO}_2^-] \Phi_{\text{NO}_2^- \rightarrow \cdot \text{OH}}}{k_0 [\text{NO}_2^-] + k_{\text{HO}^\bullet, \text{PC}} [\text{PC}]} \quad (\text{S2})$$

where  $E_p^0$  is the irradiance of incident photons;  $\varepsilon_{\text{NO}_2^-}^{254}$  is the molar absorption coefficient of  $\text{NO}_2^-$  at 254 nm;  $[\text{NO}_2^-]$  is the molar concentration of  $\text{NO}_2^-$ ;  $\Phi_{\text{NO}_2^- \rightarrow \cdot \text{OH}}$  is the quantum yield of  $\text{HO}^\bullet$  formed by  $\text{NO}_2^-$  photolysis at 254 nm (see R(2));  $k_0$  is the second-order rate constant between  $\text{HO}^\bullet$  and  $\text{NO}_2^-$  (see R(3));  $[\text{PC}]$  is the molar concentration of certain phenolic compound.

In the  $\text{UV}_{254}/\text{NO}_2^-$  system,  $[\text{NO}_2^\bullet]_{\text{ss}}$  can be calculated by the following equation (for detailed derivation, please refer to our previous study (Li et al., 2021)):

$$[\text{NO}_2^\bullet]_{\text{ss}} = \sqrt{\frac{k_0 (k_{-1} + k_2) [\text{HO}^\bullet]_{\text{ss}} [\text{NO}_2^-]}{2k_1 k_2}} \quad (\text{S3})$$

where  $k_1$ ,  $k_{-1}$ , and  $k_2$  are the rate constants of forward, reverse, and hydrolysis reactions of  $\text{N}_2\text{O}_4$ , respectively (Minero et al., 2007). Through the kinetic modeling, we can calculate the second-order rate constant for reaction of  $\text{NO}_2^\bullet$  with phenolic compounds ( $k_{\text{NO}_2^\bullet, \text{PC}} = k_{\text{NO}_2^\bullet} / [\text{NO}_2^\bullet]_{\text{ss}}$ ), as tabulated in Table 2.

## Tables

**Table S1.** The physicochemical properties of phenolic compounds used in this study.

| Phenolic compound                | Molecular structure                                                                 | Formula                                         | Molecular weight | pK <sub>a</sub> | Property                                          |
|----------------------------------|-------------------------------------------------------------------------------------|-------------------------------------------------|------------------|-----------------|---------------------------------------------------|
| Bisphenol A (BPA)                | 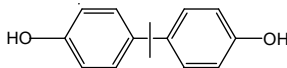   | C <sub>15</sub> H <sub>16</sub> O <sub>2</sub>  | 228              | 10.29           | Plasticizer                                       |
| Acetaminophen (ATP)              |    | C <sub>8</sub> H <sub>9</sub> NO <sub>2</sub>   | 151              | 9.86            | Analgesic-antipyretic                             |
| Salbutamol (SAL)                 |   | C <sub>13</sub> H <sub>21</sub> NO <sub>3</sub> | 239              | 9.07            | Antiasthmatic, β <sub>2</sub> adrenoceptor agonis |
| 2, 4-Dihydroxybenzophenone (BP1) |  | C <sub>13</sub> H <sub>10</sub> O <sub>3</sub>  | 214              | 7.22            | Sunscreen                                         |

**Table S2.** Characteristics of wastewater water used in this work.

| TOC (mg/L) | NO <sub>3</sub> <sup>-</sup> (mg/L) | NO <sub>2</sub> <sup>-</sup> (mg/L) | Abs <sub>254</sub> | Cl <sup>-</sup> (mg/L) | Br <sup>-</sup> (mg/L) | Na <sup>+</sup> (mg/L) | Mg <sup>2+</sup> (mg/L) | pH   |
|------------|-------------------------------------|-------------------------------------|--------------------|------------------------|------------------------|------------------------|-------------------------|------|
| 27         | 5.348                               | ND                                  | 0.3977             | 233.590                | 64                     | 16.033                 | 10.315                  | 8.33 |

ND: not detected with limit of detection (LOD) 0.016 mg/L

**Table S3.** Detailed HPLC analytical parameters for measuring compounds in this study<sup>a</sup>

| Compound                         | Molecular structure                                                                 | Mobile phase composition <sup>b</sup> | Retention time (min) | Detection wavelength (nm) <sup>c</sup> |
|----------------------------------|-------------------------------------------------------------------------------------|---------------------------------------|----------------------|----------------------------------------|
| Bisphenol A (BPA)                | 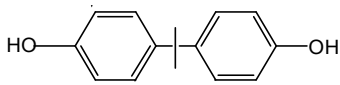   | 30% H <sub>2</sub> O+ 70% MeOH        | 5.26                 | 275                                    |
| Acetaminophen (ATP)              |    | 75% H <sub>2</sub> O+ 25% MeOH        | 5.14                 | 243                                    |
| Salbutamol (SAL)                 |   | 85% H <sub>2</sub> O+ 15% MeOH        | 6.10                 | 271                                    |
| 2, 4-Dihydroxybenzophenone (BP1) |  | 30% H <sub>2</sub> O+ 70% MeOH        | 8.20                 | 271                                    |

<sup>a</sup> An Agilent Zorbax Eclipse C18 column (5  $\mu$ m, 125 mm  $\times$  4.6 mm i.d.) was employed for analysis. <sup>b</sup> Isocratic mobile phase was at a flow rate of 1.0 mL min<sup>-1</sup>. <sup>c</sup> The detection wavelength was chosen according to the maximum absorbance in UV-vis spectrum of individual compound.

**Table S4.** Mass spectrum data and proposed molecular structures for the intermediate products generated in NO<sub>2</sub><sup>-</sup> sensitized photolysis of BPA in aqueous solution.

| TPs | RT(time) | Measured exact mass [M-H] <sup>-</sup> | Theoretical exact mass [M-H] <sup>-</sup> | Δppm | Formula of derived molecule                      | MS/MS fragments                                                                                            | Proposed structure                                                                    |
|-----|----------|----------------------------------------|-------------------------------------------|------|--------------------------------------------------|------------------------------------------------------------------------------------------------------------|---------------------------------------------------------------------------------------|
| BPA | 7.04     | 227.1084                               | 227.1078                                  | 2.9  | C <sub>15</sub> H <sub>16</sub> O <sub>2</sub>   | 227.110 、<br>211.0792 、<br>133.0674 、<br>117.0358 、<br>93.0364<br>243.1060 、<br>228.0823 、<br>227.0744 、   | 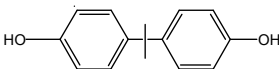   |
| B-1 | 6.60     | 243.1028                               | 243.1027                                  | 0.6  | C <sub>15</sub> H <sub>16</sub> O <sub>3</sub>   | 149.0625 、<br>133.0306 、<br>109.0310 、<br>93.0360<br>259.1033 、<br>215.1102 、                              |  |
| B-2 | 5.72     | 259.0978                               | 259.0976                                  | 0.9  | C <sub>15</sub> H <sub>16</sub> O <sub>4</sub>   | 199.0787 、<br>198.0706 、<br>184.0538                                                                       |  |
| B-3 | 7.06     | 256.0981                               | 256.0979                                  | 0.8  | C <sub>15</sub> H <sub>15</sub> O <sub>3</sub> N |                                                                                                            |  |
| B-4 | 7.71     | 272.0932                               | 272.0928                                  | 1.4  | C <sub>15</sub> H <sub>15</sub> O <sub>4</sub> N | 272.0958 、<br>257.0722 、<br>256.0646 、<br>240.0694 、<br>227.0738 、<br>210.0708 、<br>182.0755 、<br>167.0522 |  |
| B-5 | 7.58     | 288.0875                               | 288.0878                                  | -0.8 | C <sub>15</sub> H <sub>15</sub> O <sub>5</sub> N | 244.1000 、<br>226.0901 、<br>211.0667 、                                                                     |  |

|      |       |          |          |      |                                                               |                                                                                                                                                               |  |
|------|-------|----------|----------|------|---------------------------------------------------------------|---------------------------------------------------------------------------------------------------------------------------------------------------------------|--|
|      |       |          |          |      |                                                               | 195.0704 、<br>178.0532 、<br>108.0237 、<br>65.0425<br>317.0829 、<br>285.0561 、<br>255.0568 、<br>227.0620 、<br>212.0376<br>260.0973 、<br>228.0722 、<br>172.0571 |  |
| B-6  | 8.06  | 317.0781 | 317.0779 | 0.7  | C <sub>15</sub> H <sub>14</sub> O <sub>6</sub> N <sub>2</sub> |                                                                                                                                                               |  |
| B-7  | 6.18  | 304.0829 | 304.0827 | 0.7  | C <sub>15</sub> H <sub>15</sub> O <sub>6</sub> N              |                                                                                                                                                               |  |
| B-8  | 7.11  | 333.0728 | 333.0728 | -0.1 | C <sub>15</sub> H <sub>14</sub> O <sub>7</sub> N <sub>2</sub> |                                                                                                                                                               |  |
| B-9  | 4.91  | 138.0209 | 138.0197 | 8.9  | C <sub>6</sub> H <sub>5</sub> O <sub>3</sub> N                |                                                                                                                                                               |  |
| B-10 | 4.16  | 154.0153 | 154.0146 | 4.8  | C <sub>6</sub> H <sub>5</sub> O <sub>4</sub> N                |                                                                                                                                                               |  |
| B-11 | 10.33 | 151.0774 | 151.0765 | 6.5  | C <sub>9</sub> H <sub>12</sub> O <sub>2</sub>                 |                                                                                                                                                               |  |
| B-12 | 3.92  | 167.0719 | 167.0714 | 3.4  | C <sub>9</sub> H <sub>12</sub> O <sub>3</sub>                 | 149.0591                                                                                                                                                      |  |
| B-13 | 5.91  | 196.0622 | 196.0615 | 3.5  | C <sub>9</sub> H <sub>11</sub> O <sub>4</sub> N               | 196.0648 、<br>178.0544 、<br>148.0554                                                                                                                          |  |
| B-14 | 6.24  | 212.0564 | 212.0565 | -0.1 | C <sub>9</sub> H <sub>11</sub> O <sub>5</sub> N               | 212.0620 、<br>180.0332 、<br>137.0148                                                                                                                          |  |

**Table S5.** Mass spectrum data and proposed molecular structures for the intermediate products generated in NO<sub>2</sub><sup>-</sup> sensitized photolysis of ATP in aqueous solution.

| TPs | RT(time<br>) | Measured<br>exact<br>mass [M-<br>H] <sup>-</sup> | Theoretical<br>exact mass<br>[M-H] <sup>-</sup> | Δppm | Formula of<br>derived<br>molecule                           | MS/MS<br>fragments                                                                                        | Proposed structure |
|-----|--------------|--------------------------------------------------|-------------------------------------------------|------|-------------------------------------------------------------|-----------------------------------------------------------------------------------------------------------|--------------------|
| ATP | 3.35         | 150.0569                                         | 150.0561                                        | 5.4  | C <sub>8</sub> H <sub>9</sub> O <sub>2</sub> N              | 150.0569 、<br>134.0277 、<br>118.0300 、<br>107.0383                                                        |                    |
| A-1 | 0.5          | 150.0570                                         | 150.0561                                        | 4.8  | C <sub>8</sub> H <sub>9</sub> O <sub>2</sub> N              | 150.0556 、<br>118.0330 、<br>107.0382                                                                      |                    |
| A-2 | 0.48         | 166.0515                                         | 166.0510                                        | 0.4  | C <sub>8</sub> H <sub>9</sub> O <sub>3</sub> N              |                                                                                                           |                    |
| A-3 | 0.47         | 182.0463                                         | 182.0459                                        | 2.3  | C <sub>8</sub> H <sub>9</sub> O <sub>4</sub> N              | 122.0406                                                                                                  |                    |
| A-4 | 4.06         | 179.0463                                         | 179.0462                                        | 0.4  | C <sub>8</sub> H <sub>8</sub> O <sub>3</sub> N <sub>2</sub> |                                                                                                           |                    |
| A-5 | 4.86         | 195.0419                                         | 195.0411                                        | 4    | C <sub>8</sub> H <sub>8</sub> O <sub>4</sub> N <sub>2</sub> | 195.0440 、<br>179.0406 、<br>163.0176 、<br>152.0247 、<br>150.0217 、<br>133.0187 、<br>122.0264 、<br>94.0323 |                    |
| A-6 | 4.71         | 211.0363                                         | 211.0361                                        | 1.2  | C <sub>8</sub> H <sub>8</sub> O <sub>5</sub> N <sub>2</sub> |                                                                                                           |                    |
| A-7 | 5.95         | 240.0266                                         | 240.0262                                        | 1.5  | C <sub>8</sub> H <sub>7</sub> O <sub>6</sub> N <sub>3</sub> |                                                                                                           |                    |



|      |      |          |          |      |                                                               |                                                              |  |
|------|------|----------|----------|------|---------------------------------------------------------------|--------------------------------------------------------------|--|
| A-8  | 3.34 | 108.0452 | 108.0455 | -2.5 | C <sub>6</sub> H <sub>7</sub> ON                              |                                                              |  |
| A-9  | 5.03 | 138.0207 | 138.0197 | 7.2  | C <sub>6</sub> H <sub>5</sub> O <sub>3</sub> N                | 138.0197、<br>108.0236                                        |  |
| A-10 | 4.3  | 154.0152 | 154.0146 | 3.8  | C <sub>6</sub> H <sub>5</sub> O <sub>4</sub> N                | 123.0116                                                     |  |
| A-11 | 5.4  | 183.0055 | 183.0047 | 4.6  | C <sub>6</sub> H <sub>4</sub> O <sub>5</sub> N <sub>2</sub>   |                                                              |  |
| A-12 | 5.93 | 198.9994 | 198.9997 | -1.4 | C <sub>6</sub> H <sub>4</sub> O <sub>6</sub> N <sub>2</sub>   |                                                              |  |
| A-13 | 4.41 | 299.1029 | 299.1037 | -2.7 | C <sub>16</sub> H <sub>16</sub> O <sub>4</sub> N <sub>2</sub> | 299.1060、<br>239.0845                                        |  |
| A-14 | 4.71 | 315.0989 | 315.0987 | -0.7 | C <sub>16</sub> H <sub>16</sub> O <sub>5</sub> N <sub>2</sub> | 178.9602、<br>112.9877                                        |  |
| A-15 | 5.06 | 331.0939 | 331.0936 | 0.9  | C <sub>16</sub> H <sub>16</sub> O <sub>6</sub> N <sub>2</sub> | 287.1081、<br>269.0970、<br>226.0904、<br>185.0735、<br>158.0622 |  |
| A-16 | 5.04 | 328.0908 | 328.0939 | -9.4 | C <sub>16</sub> H <sub>15</sub> O <sub>5</sub> N <sub>3</sub> |                                                              |  |
| A-17 | 5.23 | 344.0884 | 344.0888 | -1.1 | C <sub>16</sub> H <sub>15</sub> O <sub>6</sub> N <sub>3</sub> |                                                              |  |
| A-18 | 5.3  | 360.0826 | 360.0837 | -3.1 | C <sub>16</sub> H <sub>15</sub> O <sub>7</sub> N <sub>3</sub> |                                                              |  |

|      |     |          |          |    |                                                               |                                      |                                                                                     |
|------|-----|----------|----------|----|---------------------------------------------------------------|--------------------------------------|-------------------------------------------------------------------------------------|
| A-19 | 5.3 | 376.0783 | 376.0796 | -1 | C <sub>16</sub> H <sub>15</sub> O <sub>8</sub> N <sub>3</sub> | 376.0891 、<br>332.0964 、<br>297.0809 | 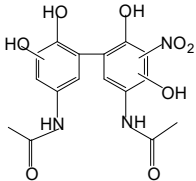 |
|------|-----|----------|----------|----|---------------------------------------------------------------|--------------------------------------|-------------------------------------------------------------------------------------|

**Table S6.** Mass spectrum data and proposed molecular structures for the intermediate products generated in NO<sub>2</sub><sup>-</sup> sensitized photolysis of SAL in aqueous solution.

| TPs | RT(time ) | Measured exact mass [M-H] <sup>-</sup> | Theoretical exact mass [M-H] <sup>-</sup> | Δppm | Formula of derived molecule                                   | MS/MS fragments                                                  | Proposed structure                                                                    |
|-----|-----------|----------------------------------------|-------------------------------------------|------|---------------------------------------------------------------|------------------------------------------------------------------|---------------------------------------------------------------------------------------|
| SAL | 3.63      | 238.1454                               | 238.1449                                  | 2.3  | C <sub>13</sub> H <sub>21</sub> O <sub>3</sub> N              | 220.1368 、<br>218.1210 、<br>190.1257 、<br>163.0653 、<br>160.0394 | 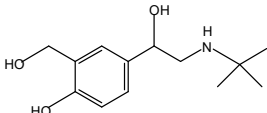   |
| S-1 | 8.08      | 270.1347                               | 270.1347                                  | 0    | C <sub>13</sub> H <sub>21</sub> O <sub>5</sub> N              |                                                                  |    |
| S-2 | 4.17      | 283.1302                               | 283.1300                                  | 1    | C <sub>13</sub> H <sub>20</sub> O <sub>5</sub> N <sub>2</sub> | 283.1325 、<br>263.1074 、<br>235.1118 、<br>208.0505 、<br>151.0286 |  |
| S-3 | 0.48      | 299.1254                               | 299.1249                                  | 2    | C <sub>13</sub> H <sub>20</sub> O <sub>5</sub> N <sub>2</sub> |                                                                  |  |
| S-4 | 3.91      | 267.1352                               | 266.1272                                  | 0.8  | C <sub>13</sub> H <sub>20</sub> O <sub>4</sub> N <sub>2</sub> | 181.0463 、<br>138.0533 、<br>123.0324 、<br>110.9450               |  |
| S-5 | 0.57      | 153.0570                               | 153.0557                                  | 8.4  | C <sub>8</sub> H <sub>10</sub> O <sub>3</sub>                 |                                                                  |  |
| S-6 | 3.92      | 151.0409                               | 151.0401                                  | 5.8  | C <sub>8</sub> H <sub>8</sub> O <sub>3</sub>                  | 149.0240 、<br>121.0311 、<br>92.0295                              |  |

**Table S7.** Mass spectrum data and proposed molecular structures for the intermediate products generated in NO<sub>2</sub><sup>-</sup> sensitized photolysis of BP1 in aqueous solution.

| TPs | RT(min) | Measured exact mass [M-H] <sup>-</sup> | Theoretical exact mass [M-H] <sup>-</sup> | Δppm | Formula of derived molecule                     | MS/MS fragments                                                                | Proposed structure |
|-----|---------|----------------------------------------|-------------------------------------------|------|-------------------------------------------------|--------------------------------------------------------------------------------|--------------------|
| BP1 | 7.22    | 213.0559                               | 213.0557                                  | 0.7  | C <sub>13</sub> H <sub>10</sub> O <sub>3</sub>  | 213.0579 、<br>169.0673 、<br>143.0518 、<br>135.0100 、<br>91.0208 、<br>65.0060   |                    |
| P-1 | 6.55    | 229.0508                               | 229.0506                                  | 0.8  | C <sub>13</sub> H <sub>10</sub> O <sub>4</sub>  |                                                                                |                    |
| P-2 | 5.62    | 245.0434                               | 245.0455                                  | -8.6 | C <sub>13</sub> H <sub>10</sub> O <sub>5</sub>  | 133.0664 、<br>77.0414                                                          |                    |
| P-3 | 7.71    | 258.0408                               | 258.0408                                  | 0    | C <sub>13</sub> H <sub>9</sub> O <sub>5</sub> N | 258.0448 、<br>241.0404 、<br>224.0365 、<br>211.0421 、<br>167.0515               |                    |
| P-4 | 7.36    | 274.0351                               | 274.0357                                  | -2.4 | C <sub>13</sub> H <sub>9</sub> O <sub>6</sub> N | 274.0393 、<br>154.0149 、<br>137.0118 、<br>93.0344                              |                    |
| P-5 | 6.5     | 242.0460                               | 242.0459                                  | 0.6  | C <sub>13</sub> H <sub>9</sub> O <sub>4</sub> N | 242.0491 、<br>225.0459 、<br>211.0424 、<br>181.0556 、<br>145.0310 、<br>120.0105 |                    |
| P-6 | 5.56    | 121.0306                               | 121.0295                                  | 9.2  | C <sub>7</sub> H <sub>6</sub> O <sub>2</sub>    | 121.0372 、<br>77.0418                                                          |                    |

|     |      |          |          |     |                                              |                                                                                     |
|-----|------|----------|----------|-----|----------------------------------------------|-------------------------------------------------------------------------------------|
| P-7 | 6.72 | 109.0304 | 109.0295 | 8.5 | C <sub>6</sub> H <sub>6</sub> O <sub>2</sub> |  |
|-----|------|----------|----------|-----|----------------------------------------------|-------------------------------------------------------------------------------------|

**Table S8.** Calculation of the screening factor  $S_\lambda$  for SRNOM<sup>a</sup>.

| SRNOM<br>(mg/L) | $S_\lambda$<br>(BPA+NO <sub>2</sub> <sup>-</sup> ) | $S_\lambda$<br>(ATP+NO <sub>2</sub> <sup>-</sup> ) | $S_\lambda$<br>(SAL+NO <sub>2</sub> <sup>-</sup> ) | $S_\lambda$<br>(BP1+NO <sub>2</sub> <sup>-</sup> ) |
|-----------------|----------------------------------------------------|----------------------------------------------------|----------------------------------------------------|----------------------------------------------------|
| 1               | 0.9371                                             | 0.9414                                             | 0.9377                                             | 0.9418                                             |
| 2               | 0.8897                                             | 0.8958                                             | 0.8886                                             | 0.8968                                             |
| 5               | 0.7689                                             | 0.7812                                             | 0.7684                                             | 0.7830                                             |

<sup>a</sup> The reaction solution contains 10 μM individual phenolic compounds, 100 μM NO<sub>2</sub><sup>-</sup> with different concentrations of SRNOM.

## Figures.

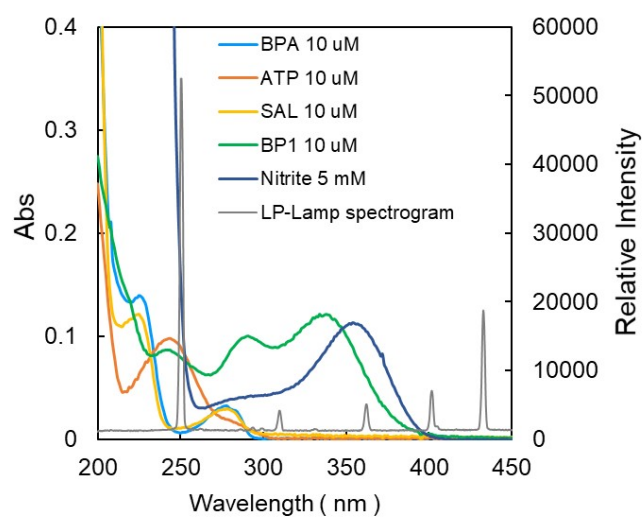

**Fig. S1.** UV-Vis absorption spectra of aqueous solutions of BPA, ATP, SAL, BP1 and  $\text{NO}_2^-$ . The emission spectrum of the LP-Hg lamp is also shown in the figure.

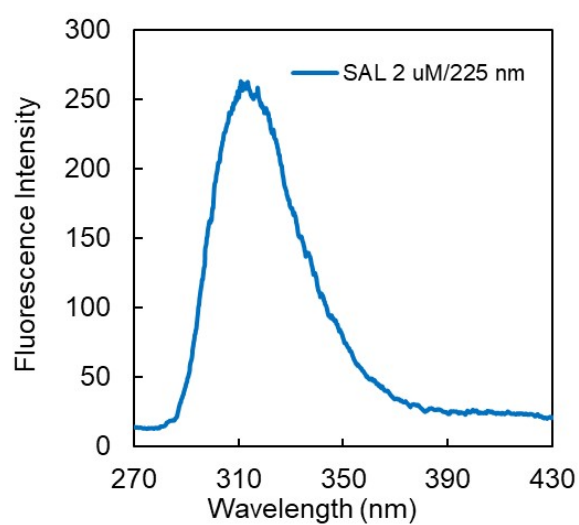

**Fig. S2.** Fluorescence spectra of the aqueous solutions of SAL. The concentration of SAL was 2  $\mu$ M and the excitation wavelength was 225 nm.

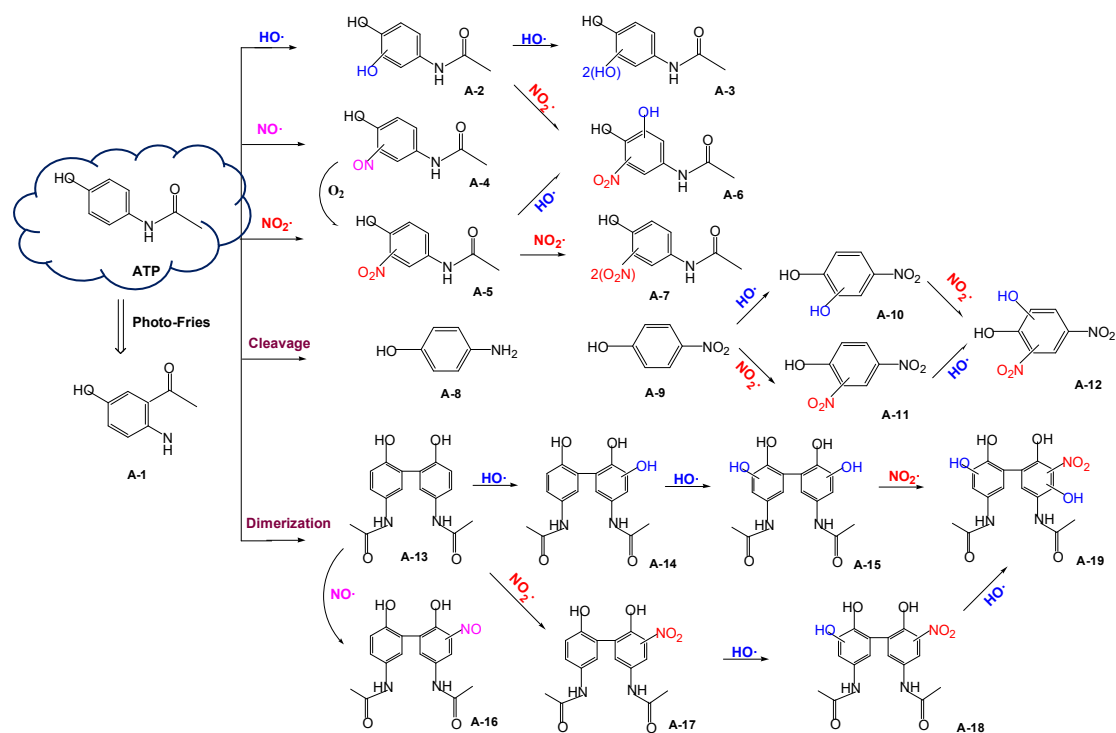

**Fig. S3.** Transformation pathways for the  $\text{NO}_2^-$ -sensitized photolysis of ATP in aqueous solution under  $\text{UV}_{254}$  irradiation. Note that there may be different isomers of the dimer which are not shown in this figure.

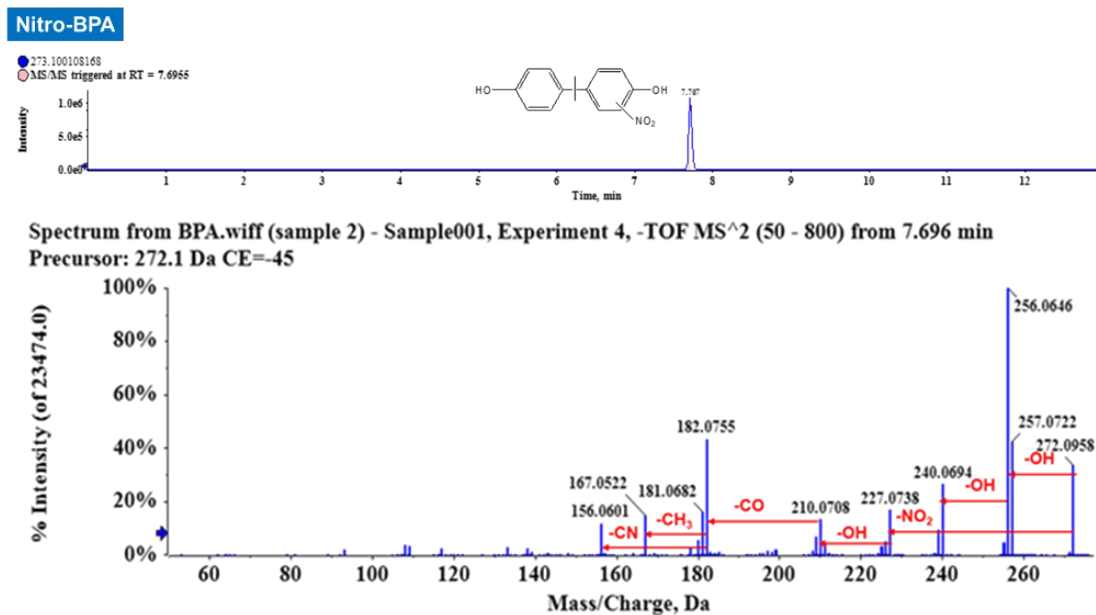

**Fig. S4.** Extracted ion chromatograph of the nitrated product of BPA (upper panel), and MS/MS spectrum of the nitrated product of BPA (down panel).

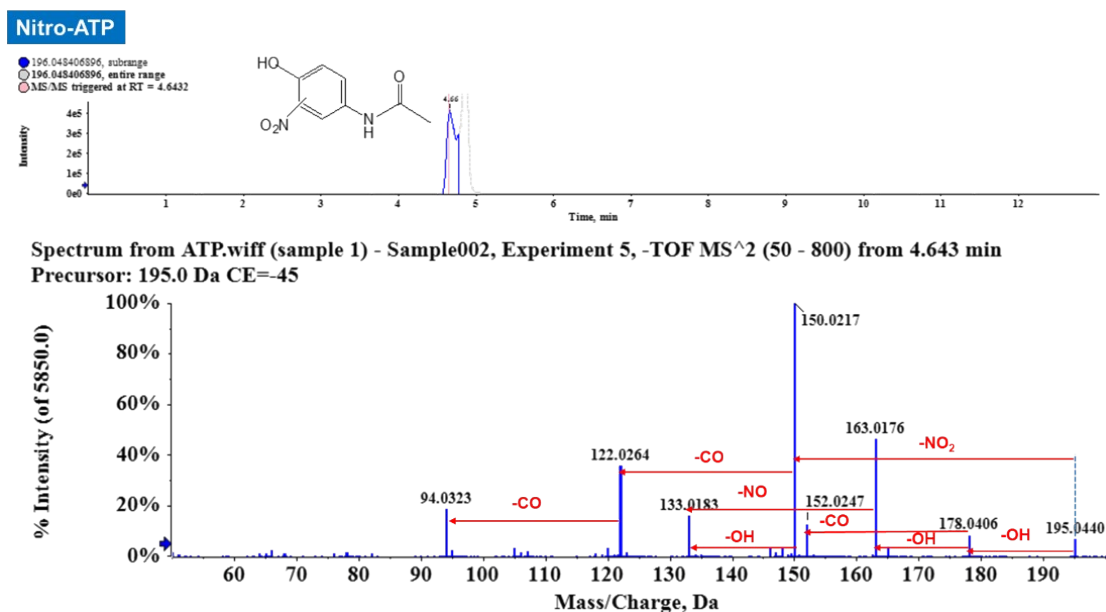

**Fig. S5.** Extracted ion chromatograph of the nitrated product of ATP (upper panel), and MS/MS spectrum of the nitrated product of ATP (down panel).

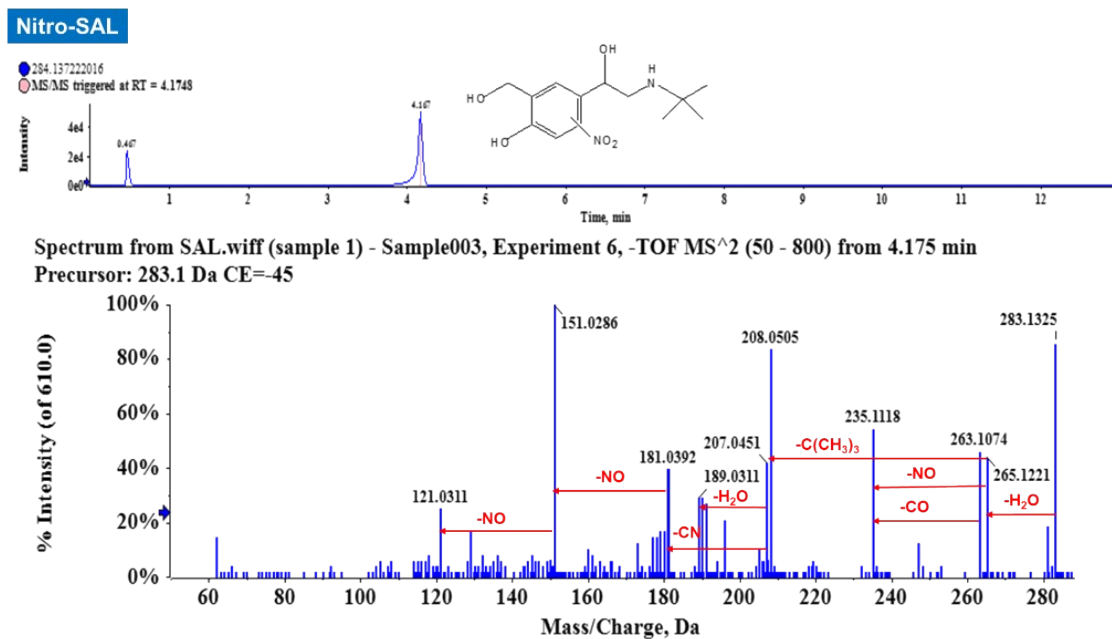

**Fig. S6.** Extracted ion chromatogram of the nitrated product of SAL (upper panel), and MS/MS spectrum of the nitrated product of SAL (down panel).

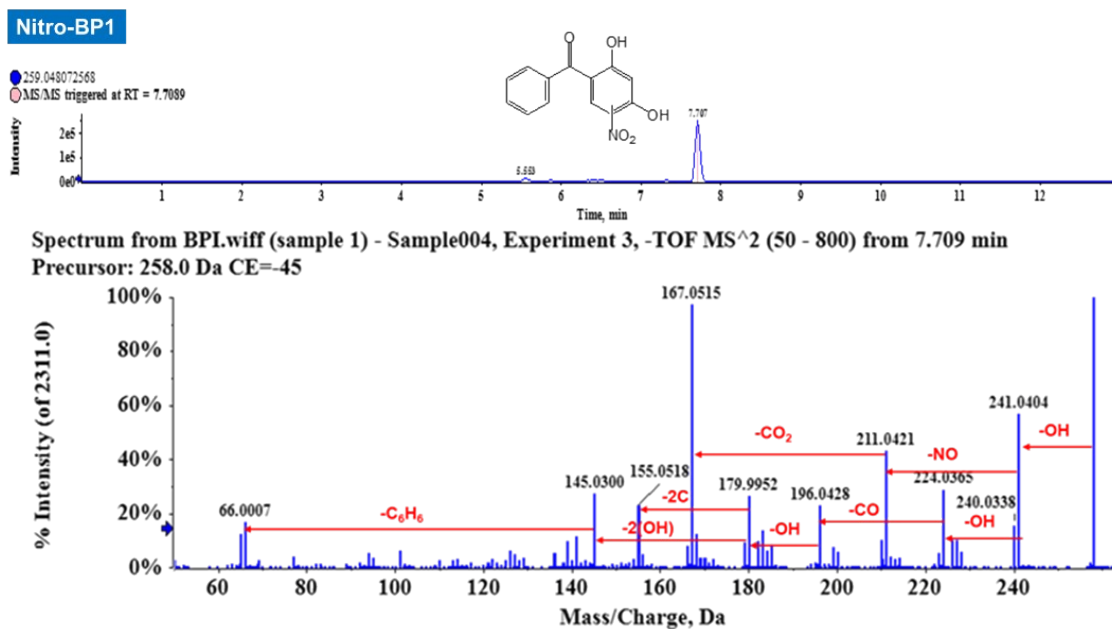

**Fig. S7.** Extracted ion chromatogram of the nitrated product of BP1 (upper panel), and MS/MS spectrum of the nitrated product of BP1 (down panel).



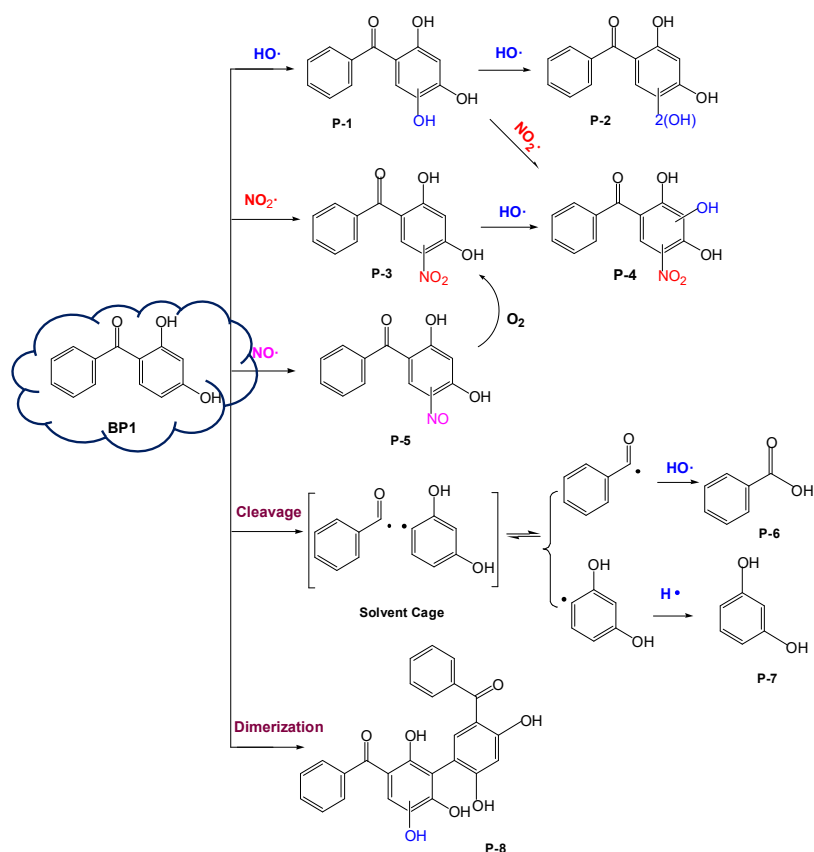

**Fig. S8.** Transformation pathways for the  $\text{NO}_2^-$  sensitized photolysis of BP1 in aqueous solution under  $\text{UV}_{254}$  irradiation.

## References

- Bhasikuttan, A. C., Singh, A.K., Palit, D.K., Sapre, A.V., Mittal, J.P., 1998. Laser flash photolysis studies on the monohydroxy derivatives of benzophenone. *J. Phys. Chem. A*. 102, 3470-3480.
- Boscá, F., Miranda, M. A., 1998. New Trends in Photobiology (Invited Review) Photosensitizing drugs containing the benzophenone chromophore. *J. Photochem. Photobiol. B: Biol.* 43(1), 1-26.
- Kawabata, K., Sugihara, K., Sanoh, S., Kitamura, S., Ohta, S., 2012. Ultraviolet-photoproduct of acetaminophen: Structure determination and evaluation of ecotoxicological effect. *J. Photochem. Photobiol. A: Chem.* 249, 29-35.
- Li, Y., Qin, H., Li, Y., Lu., Zhou, L., Chovelon, J.M., Ji, Y., 2021. Trace level nitrite sensitized photolysis of antimicrobial agents parachlormetaxylenol and chlorophene in water. *Water Res.* 200, 117275.
- Minero, C., Chiron, S., Falletti, G., Maurino, V., Pelizzetti, E., Ajassa, R., Carlotti, M.E., Vione, D., 2007. Photochemical processes involving nitrite in surface water samples. *Aquat. Sci.* 69, 71-85.
- Pozdnyakov, I.P., Zhang, X., Maksimova, T.A., Yanshole, V.V., Wu, F., Grivin, V.P., Plyusnin, V.F., 2014. Wavelength-dependent photochemistry of acetaminophen in aqueous solutions. *J. Photochem. Photobiol. A: Chem.* 274, 117-123.
- Turro, N.J., Ramamurthy, V., Scaiano, J.C., 2010. *Modern Molecular Photochemistry of Organic Molecules*. University Science Books.
